# Supplementary material for: Localized Atrial Tachycardia and Dispersion Regions in Atrial Fibrillation: Evidence of Spatial Concordance
Source: MDPI journal article supplement (doi:10.3390/jcm10143170), 2021-07-18
Supplement: s1 [file s1]

## Supplemental Materials

**Figure S1: Bi-atrial cumulative schematic of atrial fibrillation termination sites clearly identified in 49 patients.**

Left: antero-posterior view, right: postero-anterior view. Red tags = left sided termination sites, green tags = right sided termination sites.

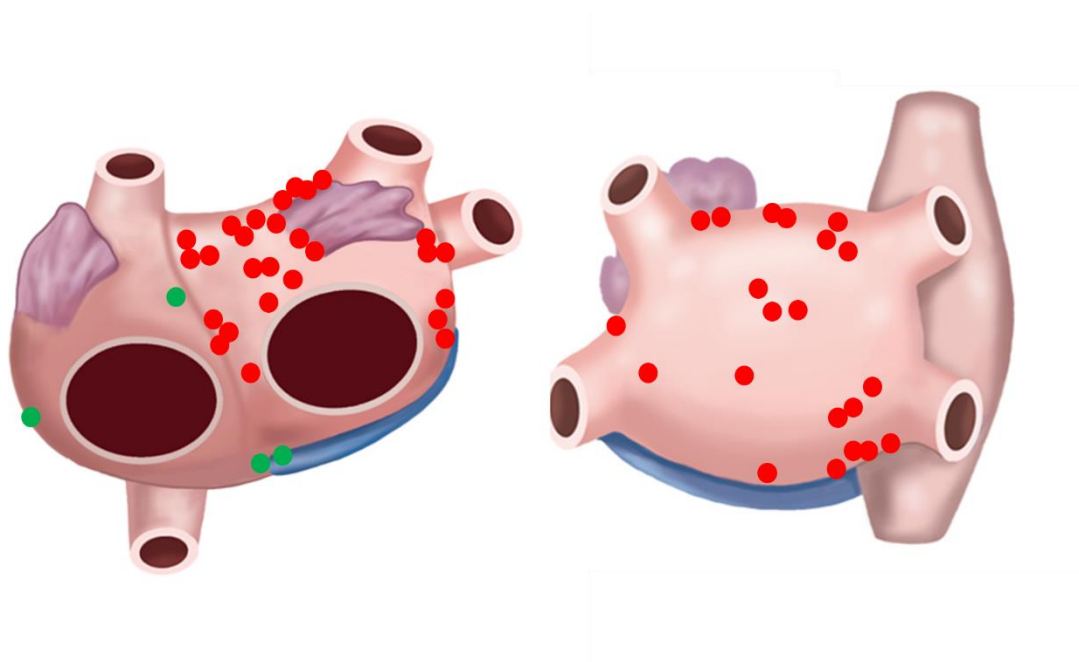

**Figure S2: Bi-atrial cumulative schematic of localized atrial tachycardia termination sites in 40 patients.**

Left: antero-posterior view, right: postero-anterior view. Red tags = left sided termination sites, green tags = right sided termination sites.

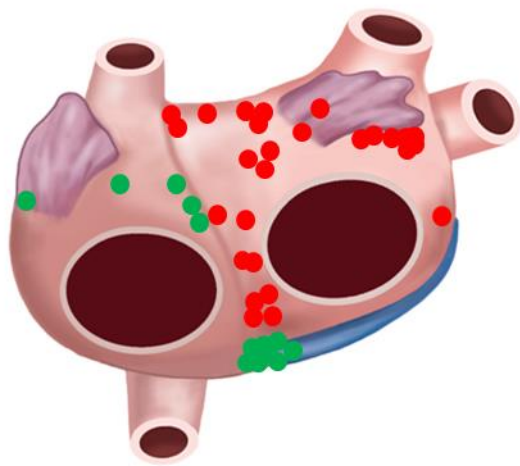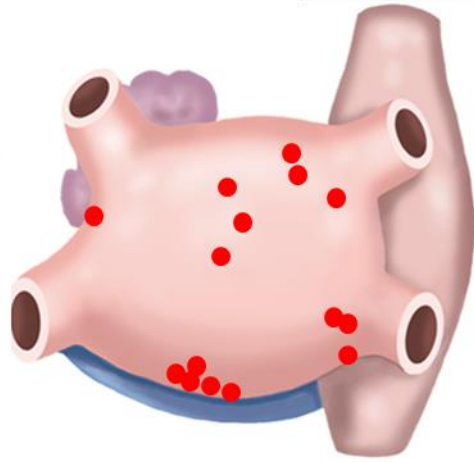

**Supplemental Table S1: Arrhythmia type/mechanism/termination site for redo procedures performed between 16/11/2016 to 01/20/2021:**

| Patient number       | Redo arrhythmia type | Arrhythmia mechanism/termination site                                                                              | Sinus rhythm conversion by ablation |
|----------------------|----------------------|--------------------------------------------------------------------------------------------------------------------|-------------------------------------|
| Patient #1           | AT                   | Peri-tricuspid flutter, localized ATs: ostium of the coronary sinus, left septum                                   | yes                                 |
| Patient #5           | AF                   | Localized ATs: right septum, left septum                                                                           | yes                                 |
| Patient #6           | AF                   | Localized ATs: left anterior wall, left atrium roof                                                                | yes                                 |
| Patient #9 (redo 1)  | AF                   | Localized ATs: left appendage anterior root, left septum, left atrium posterior wall                               | yes                                 |
| Patient #9 (redo 2)  | AT                   | Localized ATs: left superior PV, ostium of the coronary sinus. Peri-mitral flutter                                 | yes                                 |
| Patient #11          | AT                   | Localized ATs: ridge, left atrium roof                                                                             | yes                                 |
| Patient #14 (redo 1) | AT                   | Localized ATs: ridge, right superior PV                                                                            | yes                                 |
| Patient #14 (redo 2) | AT                   | Localized ATs: left atrium anterior wall. Peri-tricuspid flutter,                                                  | yes                                 |
| Patient #15          | AT                   | Localized ATs: left atrium anterior wall, left septum, right atrium lateral wall                                   | yes                                 |
| Patient #16          | AT                   | Roof dependent flutter. Localized ATs: left appendage anterior root. Peri-mitral flutter                           | yes                                 |
| Patient #18          | AT                   | Peri-mitral flutter; Localized ATs: left inferior PV, left atrium anterior wall                                    | yes                                 |
| Patient #19 (redo 1) | AT                   | Localized ATs: left septum. Roof-dependent flutter. Localized ATs: left atrium posterior wall                      | yes                                 |
| Patient #19 (redo 2) | AT                   | Localized ATs: left septum, left atrium posterior wall, right septum                                               | yes                                 |
| Patient #19 (redo 3) | AF/AT                | Localized ATs: left atrium posterior wall, right inferior PV                                                       | yes                                 |
| Patient #23          | AT                   | Localized ATs: anterior mitral annulus, ridge                                                                      | yes                                 |
| Patient #24          | AT                   | Peri-tricuspid flutter; Localized ATs: left septum, left appendage anterior root                                   | yes                                 |
| Patient #26          | AT                   | Localized ATs: Ridge. Peri-tricuspid flutter                                                                       | yes                                 |
| Patient #29          | AT                   | Localized ATs: Left atrium floor, left septum, ridge, right atrium lateral wall, right appendage, left atrium roof | yes                                 |
| Patient #32          | AF/AT                | Right atrium. Peri-tricuspid flutter                                                                               | yes                                 |
| Patient #33 (redo 1) | AT                   | Peri-mitral flutter, roof-dependent flutter                                                                        | yes                                 |
| Patient #33 (redo 2) | AF                   | Localized ATs: Left PV antrum                                                                                      | yes                                 |
| Patient #33 (redo 1) | AF                   | Localized ATs: left septum, PV antrum                                                                              | yes                                 |
| Patient #34 (redo 2) | AT                   | Localized ATs: Left appendage anterior root, left atrium floor                                                     | yes                                 |
| Patient #35 (redo 1) | AT                   | Localized ATs: left atrium posterior wall, right atrium lateral wall. Peri-tricuspid flutter                       | yes                                 |
| Patient #36          | AT                   | Roof-dependent flutter, peri-mitral flutter; Localized ATs: Left septum. Peri-tricuspid flutter.                   | yes                                 |
| Patient #37          | AT                   | Localized ATs: left atrium anterior wall, ridge                                                                    | yes                                 |
| Patient #38 (redo 1) | AT                   | Localized ATs: proximal coronary sinus                                                                             | yes                                 |
| Patient #38 (redo 2) | AT                   | Roof-dependent flutter, peri-mitral flutter                                                                        | yes                                 |
| Patient #40 (redo 1) | AT                   | Roof-dependent flutter. Localized ATs: ridge, distal coronary sinus                                                | yes                                 |
| Patient #40 (redo 2) | AT                   | Roof-dependent flutter, peri-mitral flutter. Localized ATs: proximal coronary sinus                                | yes                                 |
| Patient #41 (redo 1) | AT                   | Localized ATs: left atrium posterior wall                                                                          | yes                                 |
| Patient #41 (redo 2) | AT                   | Localized ATs: proximal coronary sinus, right atrium lateral wall, right septum                                    | yes                                 |
| Patient #45 (redo 1) | AT                   | Localized ATs: left septum                                                                                         | yes                                 |
| Patient #45 (redo 2) | AT                   | Roof-dependent flutter. Localized ATs: right PV carina                                                             | yes                                 |
| Patient #48          | AT                   | Localized ATs: ostium of the coronary sinus                                                                        | yes                                 |
| Patient #51          | AT                   | Roof-dependent flutter. Localized ATs: right inferior PV. Peri-mitral flutter                                      | yes                                 |
| Patient #52 (redo 1) | AT                   | Localized ATs: Ridge, left appendage (not ablated)                                                                 | no                                  |
| Patient #52 (redo 2) | AF                   | Roof-dependent flutter. Localized ATs: ostium of the coronary sinus                                                | yes                                 |
| Patient #55 (redo 1) | AF/AT                | Left atrium posterior wall, Roof-dependent flutter. Localized ATs: ridge                                           | yes                                 |
| Patient #55 (redo 2) | AF                   | Localized ATs: left atrium posterior wall, left septum                                                             | yes                                 |
| Patient #56          | AF                   | Localized ATs: right appendage, right septum                                                                       | yes                                 |
| Patient #57 (redo 1) | AF                   | Localized ATs: left atrium posterior wall, right atrium lateral wall. Peri-mitral flutter                          | yes                                 |
| Patient #57 (redo 2) | AF                   | Localized ATs: left atrium posterior wall, left inferior PV                                                        | yes                                 |
| Patient #59 (redo 1) | AT                   | Roof-dependent flutter, peri-mitral flutter                                                                        | yes                                 |
| Patient #59 (redo 2) | AT                   | Localized ATs: left atrium anterior                                                                                | yes                                 |
| Patient #61 (redo 1) | AF                   | Localized ATs: roof and mitral isthmus                                                                             | yes                                 |
| Patient #61 (redo 2) | AF                   | Localized ATs: roof                                                                                                | yes                                 |
| Patient #63 (redo 1) | AF                   | Localized ATs: right septum                                                                                        | yes                                 |
| Patient #63 (redo 2) | AF                   | No termination                                                                                                     | no                                  |
| Patient #68 (redo 1) | AT                   | Localized ATs: left septum. Peri-tricuspid flutter                                                                 | yes                                 |
| Patient #68 (redo 2) | AT                   | Localized ATs: proximal coronary sinus. Roof-dependent flutter                                                     | yes                                 |
| Patient #70          | AF                   | Localized ATs: left inferior PV                                                                                    | yes                                 |
| Patient #71 (redo 1) | AT                   | Roof-dependent flutter, peri-mitral flutter                                                                        | yes                                 |
| Patient #71 (redo 2) | AT                   | Localized ATs: right appendage                                                                                     | yes                                 |
| Patient #71 (redo 3) | AT                   | Peri-tricuspid flutter                                                                                             | yes                                 |
